# Supplementary material
Source: PubMed Central journal article supplement (PMC6686768)
Supplement: jamainternmed-179-1469-s001.pdf [file jamainternmed-179-1469-s001.pdf]

## Supplementary Online Content

Douketis JD, Spyropoulos AC, Duncan J, et al. Perioperative management of patients with atrial fibrillation receiving a direct oral anticoagulant. *JAMA Intern Med.* Published online August 5, 2019. doi:10.1001/jamainternmed.2019.2431

**eFigure.** Screening of Patients, Enrollment into DOAC Cohort, and Study Completion

**eAppendix 1.** Classification of Surgery/Procedure as High or Low Bleeding Risk

**eAppendix 2.** Blood Processing Methods and Coagulation Assays Used

**eAppendix 3.** Clinical Outcome Definitions

**eAppendix 4.** List of Clinical Sites, Site Investigators, and Patients Recruited per Site

**eAppendix 5.** Types of Surgery/Procedures Patients Underwent

**eAppendix 6.** Study Outcomes in Patients Adhering to DOAC Interruption and

Resumption Protocols

**eAppendix 7.** Primary Outcome Rates According to Clinical Site

**eAppendix 8.** Anticoagulant Level at Time of Surgery/Procedure based on Non-specific

Coagulation Tests

**eAppendix 9.** Drugs That Can Inhibit or Induce DOAC Activity

**eAppendix 10.** Anticoagulant Level at Time of Surgical Procedure Based on Direct Oral

Anticoagulant–Specific Coagulation Tests

This supplementary material has been provided by the authors to give readers additional information about their work.

**eFigure.** Screening of Patients, Enrollment into DOAC Cohort, and Study Completion

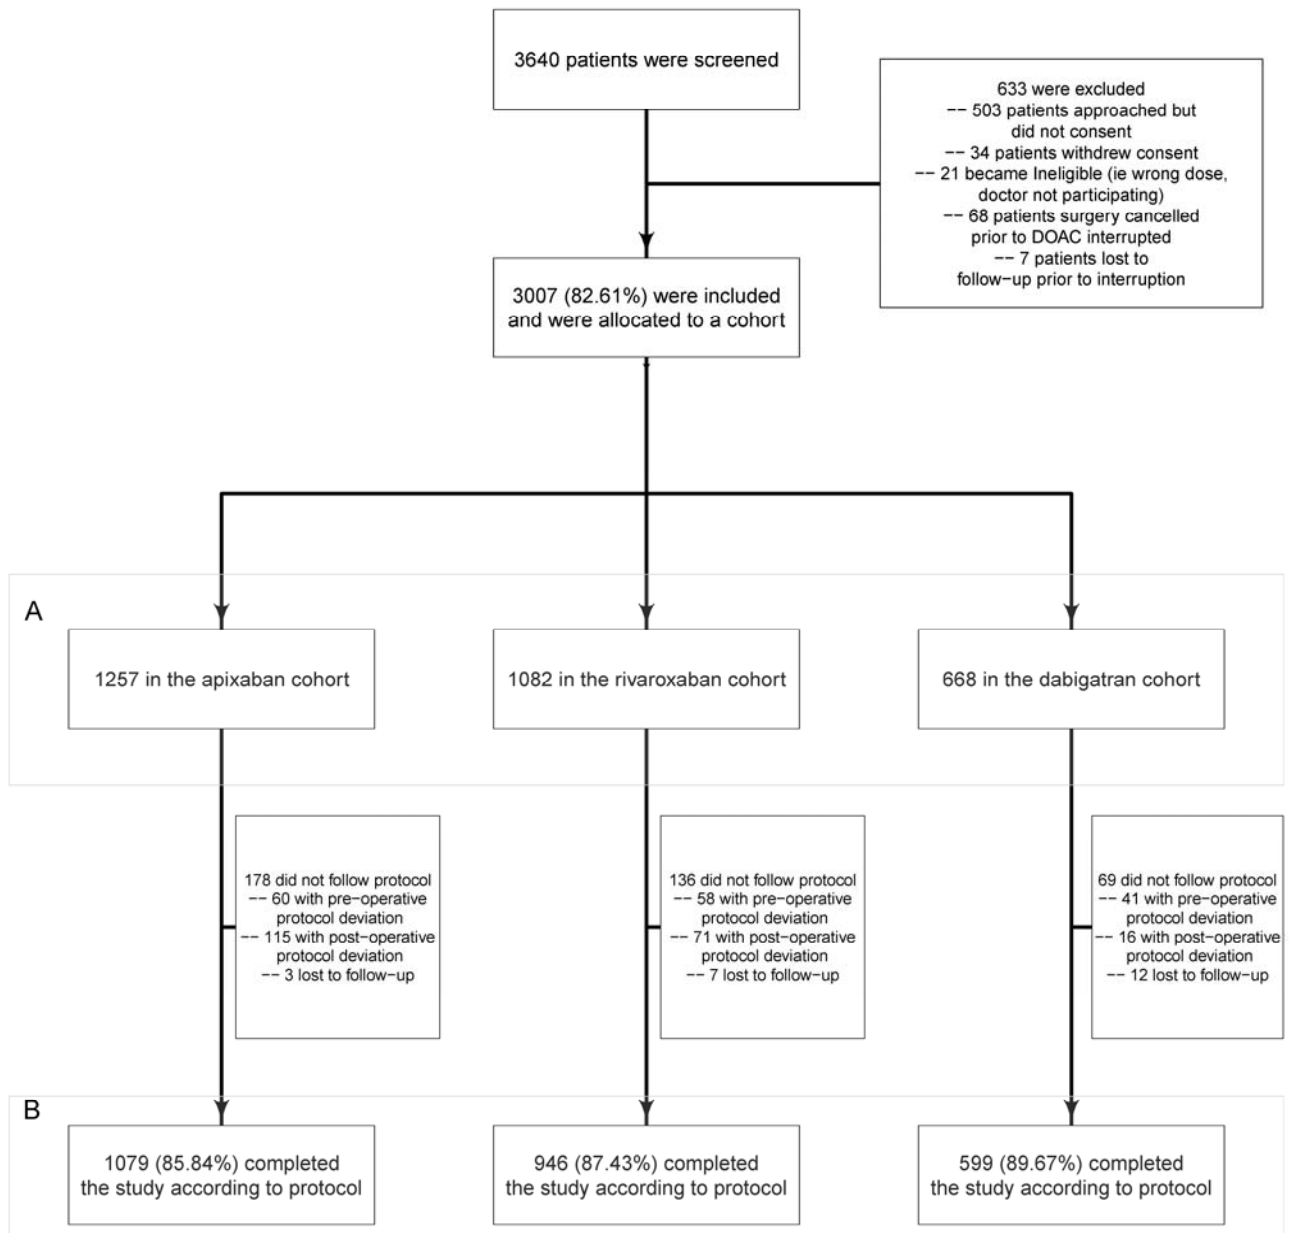

A: Primary Analysis Cohort

B: Supplementary Analysis Cohort

**Legend:** I A:  $\geq 1$  dose interrupted, B: Per protocol analysis TT, intention-to-treat; PP, per protocol.

## **eAppendix 1. Classification of Surgery/Procedure as High or Low Bleeding Risk**

### High Bleed Risk Surgery/Procedures

- 1) any surgery requiring neuraxial anesthesia
  - neuraxial anesthesia/injection
  - epidural anesthesia/injection
- 2) major intracranial or neuraxial surgery
  - brain cancer resection
  - laminectomy or neuraxial tumour resection
  - intracranial (subdural, epidural) bleed evacuation
- 3) major thoracic surgery
  - lobectomy, pneumonectomy
  - esophagectomy
- 4) major cardiac surgery
  - coronary artery bypass
  - valve replacement or repair
- 5) major vascular surgery
  - aortic aneurysm repair
  - aortobifemoral bypass, popliteal bypass
  - carotid endarterectomy
- 6) major abdominopelvic surgery
  - hepatobiliary cancer resection
  - pancreatic cancer or pseudocyst resection
  - colorectal and gastric cancer resection
  - diverticular disease resection
  - inflammatory bowel disease resection
  - renal cancer resection
  - bladder cancer resection
  - endometrial cancer resection
  - ovarian cancer resection
  - radical prostatectomy
- 7) major orthopedic surgery
  - hip arthroplasty or hip fracture repair
  - knee arthroplasty or tibial osteotomy
  - shoulder arthroplasty
  - metatarsal osteotomy
- 8) other major cancer or reconstructive surgery
  - head and neck cancer surgery
  - reconstructive facial, abdominal, limb surgery

### Low Bleeding Risk Surgery/Procedures

- 1) gastrointestinal procedures
  - colonoscopy
  - gastroscopy
  - sigmoidoscopy
  - endoscopic retrograde pancreaticocholangiography
  - capsule endoscopy

- push enteroscopy
- Barrett's esophagus ablation
- 2) cardiac procedures
  - permanent pacemaker implantation or battery change
  - internal cardiac defibrillator implantation or battery change
  - arterioventricular node ablation
  - coronary artery angiography (radial approach)
- 3) dental procedures
  - tooth extraction (up to two extractions)
  - endodontic (root canal) procedure
- 4) skin procedures
  - skin biopsy
- 5) eye procedures
  - phacoemulsification (cataract)

## **eAppendix 2. Blood Processing Methods and Coagulation Assays Used**

The pre-procedure blood sample was collected into a Vacutainer tube (Becton Dickensen Canada, Mississauga, ON) containing sodium citrate (0.105M, 3.2%); it is centrifuged for 15 minutes at 1500G, plasma is transferred and double-spun at 1500 G for 5 minutes to ensure platelet poor plasma ( $<10 \times 10^9/L$  platelets). Platelet poor plasma is separated into aliquots and stored at  $-70^\circ\text{C}$  at each participating clinical site temporarily. Plasma sample kits were prepared and shipped to sites by the Clinical Research Laboratory and Biobank, Hamilton General Hospital, shipped back periodically and stored in liquid nitrogen until analyzed. Samples were analyzed at the Hamilton Regional Laboratory Medicine Program's Special Coagulation Laboratory by medical laboratory technologists who are blinded to the patient characteristics.

The following coagulation function tests and assays were used: prothrombin time (PT) (Siemens Thromborel S, Marburg, De); activated partial thromboplastin time (aPTT) (Siemens Dade Actin FS, Marburg, De); thrombin time (TT) (Sigma-Aldrich, Oakville, Can); dilute thrombin time (dTT) (Hemoclot<sup>®</sup>, Hyphen BioMed, Neuville-sur-Oise, Fr); and anti-factor Xa levels (Hyphen BioMed, Neuville-sur-Oise, Fr). All testing was performed on a STAr-Evolution analyzer (Diagnostica Stago, Asnières-sur-Seine, Fr). The reference intervals for these assays are as follows: PT=11-15 seconds; INR=0.8-1.2; aPTT=22-35 seconds; TT=20-30 seconds. There is no therapeutic range for dTT and anti-factor Xa levels but the lower limit that is reported is  $<20$  ng/mL for the dTT and for the rivaroxaban and apixaban anti-factor Xa levels.

## eAppendix 3. Clinical Outcome Definitions

### Primary Clinical Outcomes

The first primary outcome is major bleeding, defined by any one of the following criteria:

- i) Fatal bleeding
- ii) Symptomatic and retroperitoneal, intracranial, intraspinal, intraocular, pericardial, intramuscular with compartment syndrome, or intra-articular;
- iii) Extrasurgical site bleeding causing a drop in hemoglobin  $\geq 20$  g/L (1.24 mmol/L)
- iv) Extrasurgical site bleeding leading to transfusion  $\geq 2$  units whole blood or red cells within 48 hours of the bleed;
- v) surgical bleed that leads to intervention (e.g., re-operation) or has one of: interferes with mobilization, leads to delayed wound healing, or leads to deep wound infection;
- vi) Surgical site bleeding requiring intervention (re-operation) resulting in prolonged care or stay
- vii) Surgical site bleeding that is unexpected or prolonged
- viii) Surgical site bleeding sufficiently large to cause hemodynamic instability associated with drop in hemoglobin  $\geq 20$  g/L (1.24 mmol/L) within 48 hour of seeking medical help
- ix) Surgical site bleeding sufficiently large to cause hemodynamic instability associated with transfusion  $\geq 2$  units whole blood or red cells within 48 hours of the bleed;

The second primary outcome is arterial thromboembolism, comprising:

- i) ischemic stroke, defined as any new focal neurologic deficit that persists for  $>24$  hours or any new focal neurologic deficit of any duration, that occurs with evidence of acute infarction on computed tomography (CT) or magnetic resonance imaging (MRI) of the brain;
- ii) systemic embolism, defined as symptomatic embolism to upper or lower extremity or abdominal organ, confirmed intra-operatively or by objective imaging studies (e.g., CT angiography);
- iii) transient ischemic attack, defined as symptomatic focal neurologic deficit (lasting typically  $<1$  hour and not for  $>24$  hours), that occurs with no evidence of acute infarction on CT or MRI of brain.

### Secondary Clinical Outcomes

The secondary clinical outcomes comprise: i) clinically relevant non-major bleeding, defined as bleeding not satisfying criteria for major bleeding that requires a medical assessment (e.g., unscheduled visit to the doctor's office or to an emergency department) and/or treatment/intervention such as DOAC interruption; ii) minor bleeding, defined as bleeding not satisfying criteria for major or clinically relevant non-major bleeding; iii) death due to any cause; iv) venous thromboembolism, defined by symptomatic deep vein thrombosis or pulmonary embolism that is confirmed by objective imaging studies (e.g., ultrasound, CT pulmonary angiogram); and v) acute coronary syndrome, defined by symptomatic myocardial ischemia that is confirmed by objective criteria (electrocardiographic and/or elevated cardiac troponins).

**eAppendix 4.** List of Clinical Sites, Site Investigators, and Patients Recruited per Site

| <b>Clinical Site</b>                                              | <b>Site Investigator</b> | <b>Number of Patients Enrolled</b> |
|-------------------------------------------------------------------|--------------------------|------------------------------------|
| St Joseph's Healthcare Hamilton, Hamilton, ON, Canada             | Frederick Spencer        | 424                                |
| Hamilton General Hospital, Hamilton, ON, Canada                   | Sam Schulman             | 953                                |
| Juravinski Hospital, Hamilton, ON, Canada                         | Peter Gross              | 101                                |
| McMaster University Medical Centre, Hamilton, ON, Canada          | Shannon Bates            | 16                                 |
| University of Alberta, Edmonton, AB, Canada                       | Cynthia Wu               | 22                                 |
| The Ottawa Hospital, Ottawa, ON, Canada                           | Marc Carrier             | 314                                |
| Queen Elizabeth II Hospital, Halifax, NS, Canada                  | Sudeep Shivakumar        | 100                                |
| St. Mary's, Montreal, PQ, Canada                                  | Susan Solymoss           | 46                                 |
| Hôpital Montfort, Ottawa, ON, Canada                              | Gregoire Le Gal          | 209                                |
| Montreal General Hospital, Montreal, PQ, Canada                   | Susan Solymoss           | 71                                 |
| Health Science Centre, Winnipeg, MB, Canada                       | Stephen Kowalski         | 47                                 |
| Centre hospitalier Universitaire de Sherbrooke, PQ, Canada        | Genevieve Le Templier    | 57                                 |
| Vancouver General Hospital, Vancouver, BC, Canada                 | Agnes Lee                | 89                                 |
| Peter Lougheed Centre, Calgary, AB, Canada                        | Elizabeth MacKay         | 23                                 |
| Toronto General Hospital, Toronto, ON, Canada                     | Erik Yeo                 | 81                                 |
| Hôpital Maisonneuve-Rosemont, Montreal, PQ, Canada                | Jeannine Kassis          | 48                                 |
| Jewish General Hospital, Montreal, PQ, Canada                     | Mark Blostein            | 44                                 |
| Henry Ford Health System, Detroit, MI, USA                        | Vinay Shah               | 33                                 |
| NorthShore University Health Systems, Evanston, IL, USA           | Alfonso Tafur            | 192                                |
| Universitaire Ziekenhuizen, Leuven, Belgium                       | Thomas Vanassche         | 107                                |
| Kaiser Permanente Colorado, Denver, CO, US                        | Nathan Clark             | 20                                 |
| Academic Medical Centre, University of Amsterdam, The Netherlands | Michiel Coppens          | 4                                  |
| University of Thessaly, Larissa, Greece                           | Eleni Arnaoutoglou       | 6                                  |

**eAppendix 5. Types of Surgery/Procedures Patients Underwent**

| Surgery/Procedure        | Apixaban    | Dabigatran  | Rivaroxaban |
|--------------------------|-------------|-------------|-------------|
|                          | Cohort      | Cohort      | Cohort      |
|                          | n=1257      | n=668       | n=1082      |
| Cardiothoracic           | 528 (42%)   | 204 (30.5%) | 387 (35.8%) |
| Gastrointestinal         | 250 (19.9%) | 149 (22.3%) | 228 (21.1%) |
| Orthopedic               | 135 (10.7%) | 103 (15.4%) | 105 (9.7%)  |
| Urologic                 | 103 (8.2%)  | 72 (10.8%)  | 103 (9.5%)  |
| General Surgery          | 93 (7.4%)   | 45 (6.7%)   | 83 (7.7%)   |
| Ear-Nose-Throat          | 39 (3.1%)   | 23 (3.4%)   | 49 (4.5%)   |
| Gynecological            | 27 (2.1%)   | 18 (2.7%)   | 35 (3.2%)   |
| Interventional Radiology | 26 (2.1%)   | 16 (2.4%)   | 23 (2.1%)   |
| Dermatological           | 20 (1.6%)   | 15 (2.2%)   | 22 (2.0%)   |
| Neurosurgical            | 16 (1.3%)   | 10 (1.5%)   | 21 (1.9%)   |
| Vascular                 | 12 (0.95%)  | 7 (1.0%)    | 10 (0.92%)  |
| Ophthalmological         | 8 (0.64%)   | 4 (0.6%)    | 10 (0.92%)  |
| Dental                   | 0 (0%)      | 2 (0.3%)    | 6 (0.55%)   |
| Other                    | 0 (0%)      | 0 (0%)      | 0 (0%)      |



**eAppendix 6.** Study Outcomes in Patients Adhering to DOAC Interruption and Resumption Protocols\*

| Outcome                                       | DOAC Cohort                  |                              |                               |
|-----------------------------------------------|------------------------------|------------------------------|-------------------------------|
|                                               | Apixaban                     | Dabigatran                   | Rivaroxaban                   |
|                                               | n=1079                       | n=599                        | n=946                         |
| <b>Primary - number, % (1-sided 95% CI)</b>   |                              |                              |                               |
| Major bleeding†                               | 13, 1.2 (0-1.89);<br>p=0.031 | 6, 1.0 (0-1.93);<br>p=0.04   | 16, 1.69 (0-2.53);<br>p=0.249 |
| Arterial thromboembolism‡§                    | 2, 0.19 (0-0.56);<br>p<0.001 | 3, 0.50 (0-1.25);<br>p=0.022 | 4, 0.42 (0-0.94);<br>p=0.003  |
| <b>Secondary - number, % (2-sided 95% CI)</b> |                              |                              |                               |
| Death                                         | 2, 0.19 (0.05-0.67)          | 2, 0.33 (0.09-1.21)          | 3, 0.32 (0.11-0.93)           |
| Myocardial infarction                         | 1, 0.09 (0.02-0.52)          | 0, 0 (0-0.64)                | 0, 0 (0-0.4)                  |
| Deep-vein thrombosis                          | 2, 0.19 (0.0 - 0.67)         | 1, 0.17 (0.03-0.94)          | 0, 0 (0-0.4)                  |
| Pulmonary embolism                            | 3, 0.28 (0.09-0.81)          | 1, 0.17 (0.03-0.94)          | 1, 0.11 (0.02-0.6)            |
| Arterial catheter thrombosis¶                 | 1, 0.09 (0.02-0.52)          | 1, 0.17 (0.03-0.94)          | 0, 0 (0-0.4)                  |
| Clinically relevant non-major bleeding        | 20, 1.85 (1.2-2.85)          | 11, 1.84 (1.03-3.26)         | 25, 2.64 (1.8-3.87)           |
| Minor bleeding                                | 50, 4.63 (3.53-6.06)         | 33, 5.51 (3.95-7.64)         | 56, 5.92 (4.59-7.61)          |

**Legend:**

\*Analysis done in patients in whom no DOAC was taken on interruption days pre-surgery/procedure and no DOAC taken on day of surgery/procedure.

†p-value of the 1-sided test for one proportion to test the proportion of major bleeding per DOAC is <2%

‡p-value of the 1-sided test for one proportion to test the proportion of ATE per DOAC is <1.5%

§All events were ischemic stroke.

¶No episodes of catheter-related venous thrombosis were reported.

**eAppendix 7. Primary Outcome Rates According to Clinical Site**

| <b>Clinical Site</b>                                              | <b>Number of patients enrolled</b> | <b>Number (%) of patients with major bleed</b> | <b>Number (%) of patients with ATE</b> |
|-------------------------------------------------------------------|------------------------------------|------------------------------------------------|----------------------------------------|
| St Joseph's Healthcare Hamilton, Hamilton, ON, Canada             | 424                                | 1 (0.24%)                                      | 3 (0.71%)                              |
| Hamilton General Hospital, Hamilton, ON, Canada                   | 953                                | 7 (0.73%)                                      | 4 (0.42%)                              |
| Juravinski Hospital, Hamilton, ON, Canada                         | 101                                | 2 (1.98%)                                      | 0 (0%)                                 |
| McMaster University Medical Centre, Hamilton, ON, Canada          | 16                                 | 0 (0%)                                         | 0 (0%)                                 |
| University of Alberta, Edmonton, AB, Canada                       | 22                                 | 2 (9.09%)                                      | 0 (0%)                                 |
| The Ottawa Hospital, Ottawa, ON, Canada                           | 314                                | 5 (1.59%)                                      | 0 (0%)                                 |
| Queen Elizabeth II Hospital, Halifax, NS, Canada                  | 100                                | 3 (3%)                                         | 0 (0%)                                 |
| St. Mary's, Montreal, PQ, Canada                                  | 46                                 | 0 (0%)                                         | 0 (0%)                                 |
| Hôpital Montfort, Ottawa, ON, Canada                              | 209                                | 0 (0%)                                         | 0 (0%)                                 |
| Montreal General Hospital, Montreal, PQ, Canada                   | 71                                 | 0 (0%)                                         | 0 (0%)                                 |
| Health Science Centre, Winnipeg, MB, Canada                       | 47                                 | 3 (6.38%)                                      | 0 (0%)                                 |
| Centre hospitalier Universitaire de Sherbrooke, PQ, Canada        | 57                                 | 1 (1.75%)                                      | 0 (0%)                                 |
| Vancouver General Hospital, Vancouver, BC, Canada                 | 89                                 | 4 (4.49%)                                      | 0 (0%)                                 |
| Peter Lougheed Centre, Calgary, AB, Canada                        | 23                                 | 1 (4.35%)                                      | 0 (0%)                                 |
| Toronto General Hospital, Toronto, ON, Canada                     | 81                                 | 1 (1.23%)                                      | 1 (1.23%)                              |
| Hôpital Maisonneuve-Rosemont, Montreal, PQ, Canada                | 48                                 | 2 (4.17%)                                      | 0 (0%)                                 |
| Jewish General Hospital, Montreal, PQ, Canada                     | 44                                 | 1 (2.27%)                                      | 0 (0%)                                 |
| Henry Ford Health System, Detroit, MI, USA                        | 33                                 | 2 (6.06%)                                      | 1 (3.03%)                              |
| NorthShore University Health Systems, Evanston, IL, USA           | 192                                | 2 (1.04%)                                      | 1 (0.52%)                              |
| Universitaire Ziekenhuizen, Leuven, Belgium                       | 107                                | 6 (5.61%)                                      | 0 (0%)                                 |
| Kaiser Permanente Colorado, Denver, CO, USA                       | 20                                 | 0 (0%)                                         | 0 (0%)                                 |
| Academic Medical Centre, University of Amsterdam, The Netherlands | 4                                  | 0 (0%)                                         | 0 (0%)                                 |
| University of Thessaly, Larissa, Greece                           | 6                                  | 0 (0%)                                         | 0 (0%)                                 |

**eAppendix 8.** Anticoagulant Level at Time of Surgery/Procedure based on Non-specific Coagulation Tests

| Measurement of Anticoagulant Level           | DOAC Cohort      |                  |                  |                  |                  |                  |
|----------------------------------------------|------------------|------------------|------------------|------------------|------------------|------------------|
|                                              | Apixaban         |                  | Dabigatran       |                  | Rivaroxaban      |                  |
|                                              | Low bleed risk   | High bleed risk  | Low bleed risk   | High bleed risk  | Low bleed risk   | High bleed risk  |
|                                              | n=851            | n=406            | n=440            | n=228            | n=709            | n=373            |
| Samples collected – no. (%)                  | 772 (90.7)       | 357 (87.9)       | 367 (83.4)       | 196 (85.7)       | 627 (88.4)       | 338 (90.6)       |
| Samples with residual DOAC values – no. (%)  | 751 (88.2)       | 335 (82.5)       | 352 (80.0)       | 183 (80.5)       | 606 (85.5)       | 314 (84.2)       |
| <b>Non-specific coagulation tests*</b>       |                  |                  |                  |                  |                  |                  |
| PT, median (IQR)                             | 13.4 (12.6-14.6) | 13.5 (12.6-14.5) | 13.9 (12.7-15.5) | 13.7 (12.9-14.2) | 13.6 (12.9-14.7) | 13.5 (12.9-14.2) |
| <i>above normal (&gt;13.5 sec) - no. (%)</i> | 150 (20.0)       | 61 (18.2)        | 31 (8.8)         | 21 (11.5)        | 81 (13.4)        | 36 (11.5)        |
| INR, median (IQR)                            | 1 (1-1.1)        | 1 (1-1.1)        | 1 (1-1.1)        | 1 (1-1.1)        | 1 (1-1.1)        | 1 (1-1.1)        |
| <i>above normal (&gt;1.2) - no. (%)</i>      | 45 (6.0)         | 13 (3.9)         | 20 (5.7)         | 2 (1.1)          | 32 (5.3)         | 8 (2.5)          |
| aPTT, median (IQR)                           | 29 (27-31)       | 28 (27-30)       | 32 (29-35.8)     | 30 (28-32)       | 27 (25-30)       | 27 (25-29)       |
| <i>above normal (&gt;35 sec) - no. (%)</i>   | 95 (12.65)       | 26 (7.8)         | 88 (25.0)        | 12 (6.6)         | 57 (9.4)         | 14 (4.46)        |
| TT, median (IQR)                             | 24 (23-25)       | 24 (23-25)       | 35 (28-48)       | 27 (25-31)       | 24 (21-26)       | 24 (20-26)       |
| <i>above normal (&gt;30 sec) - no. (%)</i>   | 13 (1.7)         | 7 (2.1)          | 224 (63.6)       | 48 (26.2)        | 40 (6.6)         | 5 (1.6)          |

**Legend:**

\*Results expressed as median (inter-quartile range) and proportions of patients within each category expressed as number (percent); PT, prothrombin time; INR, international normalised ratio; aPTT, activated partial thromboplastin time; TT, thrombin time; IQR, inter-quartile range.

**eAppendix 9.** Drugs That Can Inhibit or Induce DOAC Activity

Antiarrhythmics: amiodarone, digoxin, diltiazem, dronedarone, quinidine, verapamil

Antibiotics: azithromycin, clarithromycin, rifampicin

Anticonvulsants: carbamazepine, phenobarbital, phenytoin

Antifungals: fluconazole, itraconazole, posaconazole, voriconazole

HIV protease inhibitors: ritonavir

Other: naproxen, St. John's wort

**eAppendix 10.** Anticoagulant Level at Time of Surgical Procedure Based on Direct Oral Anticoagulant–Specific Coagulation Tests

| Measurement of Anticoagulant Level                                                          | DOAC Cohort, No. (%)        |                              |                             |                              |                             |                              |
|---------------------------------------------------------------------------------------------|-----------------------------|------------------------------|-----------------------------|------------------------------|-----------------------------|------------------------------|
|                                                                                             | Apixaban                    |                              | Dabigatran                  |                              | Rivaroxaban                 |                              |
|                                                                                             | Low Bleeding Risk (n = 851) | High Bleeding Risk (n = 406) | Low Bleeding Risk (n = 440) | High Bleeding Risk (n = 228) | Low Bleeding Risk (n = 709) | High Bleeding Risk (n = 373) |
| Samples collected                                                                           | 772 (90.7)                  | 357 (87.9)                   | 367 (83.4)                  | 196 (85.7)                   | 627 (88.4)                  | 338 (90.6)                   |
| Samples with residual DOAC values                                                           | 751 (88.2)                  | 335 (82.5)                   | 352 (80.0)                  | 183 (80.5)                   | 606 (85.5)                  | 314 (84.2)                   |
| DOAC-Specific Coagulation Tests                                                             |                             |                              |                             |                              |                             |                              |
| Anti-Factor Xa Level (Apixaban and Rivaroxaban) or Dilute Thrombin Time (Dabigatran), ng/mL |                             |                              |                             |                              |                             |                              |
| ≥50                                                                                         | 96 (12.9)                   | 7 (2.09)                     | 25 (7.1)                    | 1 (0.55)                     | 27 (4.5)                    | 2 (0.64)                     |
| 30-49.9                                                                                     | 134 (17.8)                  | 16 (4.8)                     | 35 (9.9)                    | 1 (0.55)                     | 133 (21.9)                  | 44 (14.0)                    |
| <30                                                                                         | 521 (69.4)                  | 312 (93.1)                   | 292 (82.9)                  | 181 (98.9)                   | 446 (73.6)                  | 268 (85.3)                   |

Abbreviation: DOAC, direct oral anticoagulant.
